# Supplementary material for: Single Sample Expression-Anchored Mechanisms Predict Survival in Head and Neck Cancer
Source: PubMed Central journal article supplement (PMC3266878; doi:10.1371/journal.pcbi.1002350), 2012-01-26
Supplement: pcbi.1002350.s008.pdf [file pcbi.1002350.s008.pdf]

**Table S1. 57 HNSCC FAIME Features identified between tumor tissue and non-tumor control tissue in all three HNSCC datasets.** References are provided for mechanisms that were also found by other approaches (e.g. enrichment, CORG, and/or GSEA) comparing tumor to normal tissues (**Figure 3**), and for co-expressed clusters found in **Figure 5**.

| HNSCC FAIME Features                                                                                  | up- or down-regulated in HNSCC tumor samples (FAIME score, Methods, Fig. 3,5) | Confirmed by enrichment, GSEA or CORG (Fig. 3; # of methods; found in any of datasets A-C) | Scale | ID         | # of genes (GO from NCBI on Dec. 11, 09; Bioconductor <i>kegg.db</i> v2.3.5 on Sep 16, 09) | Cluster (Fig. 5) |
|-------------------------------------------------------------------------------------------------------|-------------------------------------------------------------------------------|--------------------------------------------------------------------------------------------|-------|------------|--------------------------------------------------------------------------------------------|------------------|
| Bladder cancer                                                                                        | ↑                                                                             | 3                                                                                          | KEGG  | hsa05219   | 42                                                                                         | α                |
| ECM-receptor interaction                                                                              | ↑                                                                             | 3                                                                                          | KEGG  | hsa04512   | 84                                                                                         | α                |
| extracellular matrix binding                                                                          | ↑                                                                             | 3                                                                                          | GO-MF | GO:0050840 | 13                                                                                         | α                |
| Focal adhesion                                                                                        | ↑                                                                             | 3                                                                                          | KEGG  | hsa04510   | 202                                                                                        | α                |
| glucuronosyl-N-acetylgalactosaminyl-proteoglycan 4-beta-N-acetylgalactosaminyltransferase activity    | ↑                                                                             | 1                                                                                          | GO-MF | GO:0047238 | 4                                                                                          | α                |
| Glycosaminoglycan biosynthesis - chondroitin sulfate                                                  | ↑                                                                             | 0                                                                                          | KEGG  | hsa00532   | 22                                                                                         | α                |
| L-ascorbic acid binding                                                                               | ↑                                                                             | 3                                                                                          | GO-MF | GO:0031418 | 21                                                                                         | α                |
| metalloendopeptidase activity                                                                         | ↑                                                                             | 3                                                                                          | GO-MF | GO:0004222 | 104                                                                                        | α                |
| N-acetylgalactosaminyl-proteoglycan 3-beta-glucuronosyltransferase activity                           | ↑                                                                             | 1                                                                                          | GO-MF | GO:0050510 | 4                                                                                          | α                |
| oxidoreductase activity, acting on paired donors, with incorporation or reduction of molecular oxygen | ↑                                                                             | 2                                                                                          | GO-MF | GO:0016705 | 16                                                                                         | α                |
| p53 signaling pathway                                                                                 | ↑                                                                             | 3                                                                                          | KEGG  | hsa04115   | 69                                                                                         | α                |
| Pathways in cancer                                                                                    | ↑                                                                             | 3                                                                                          | KEGG  | hsa05200   | 331                                                                                        | α                |
| platelet-derived growth factor binding                                                                | ↑                                                                             | 2                                                                                          | GO-MF | GO:0048407 | 11                                                                                         | α                |
| procollagen-proline 4-dioxygenase activity                                                            | ↑                                                                             | 1                                                                                          | GO-MF | GO:0004656 | 4                                                                                          | α                |
| Small cell lung cancer                                                                                | ↑                                                                             | 3                                                                                          | KEGG  | hsa05222   | 86                                                                                         | α                |
| Base excision repair                                                                                  | ↑                                                                             | 1                                                                                          | KEGG  | hsa03410   | 35                                                                                         | β                |
| Cell cycle                                                                                            | ↑                                                                             | 3                                                                                          | KEGG  | hsa04110   | 129                                                                                        | β                |
| cyclin-dependent protein kinase regulator activity                                                    | ↑                                                                             | 1                                                                                          | GO-MF | GO:0016538 | 6                                                                                          | β                |
| DNA replication                                                                                       | ↑                                                                             | 2                                                                                          | KEGG  | hsa03030   | 36                                                                                         | β                |
| Mismatch repair                                                                                       | ↑                                                                             | 0                                                                                          | KEGG  | hsa03430   | 23                                                                                         | β                |
| Pyrimidine metabolism                                                                                 | ↑                                                                             | 2                                                                                          | KEGG  | hsa00240   | 97                                                                                         | β                |
| ribonuclease H activity                                                                               | ↑                                                                             | 1                                                                                          | GO-MF | GO:0004523 | 7                                                                                          | β                |
| metabolism                                                                                            | ↓                                                                             | 2                                                                                          | KEGG  | hsa00650   | 34                                                                                         | γ                |
| 1- and 2-Methylnaphthalene degradation                                                                | ↓                                                                             | 2                                                                                          | KEGG  | hsa00624   | 13                                                                                         | γ                |
| 3-Chloroacrylic acid degradation                                                                      | ↓                                                                             | 2                                                                                          | KEGG  | hsa00641   | 12                                                                                         | γ                |
| 3-chloroallyl aldehyde dehydrogenase activity                                                         | ↓                                                                             | 1                                                                                          | GO-MF | GO:0004028 | 4                                                                                          | γ                |

|                                                        |   |   |       |            |    |   |
|--------------------------------------------------------|---|---|-------|------------|----|---|
| acyl-CoA dehydrogenase activity                        | ↓ | 1 | GO-MF | GO:0003995 | 9  | Y |
| acyl-CoA oxidase activity                              | ↓ | 0 | GO-MF | GO:0003997 | 4  | Y |
| acylglycerol lipase activity                           | ↓ | 0 | GO-MF | GO:0047372 | 6  | Y |
| alcohol dehydrogenase activity, zinc-dependent         | ↓ | 2 | GO-MF | GO:0004024 | 4  | Y |
| aldehyde dehydrogenase (NAD) activity                  | ↓ | 2 | GO-MF | GO:0004029 | 8  | Y |
| aldehyde dehydrogenase [NAD(P)+] activity              | ↓ | 2 | GO-MF | GO:0004030 | 6  | Y |
| Arachidonic acid metabolism                            | ↓ | 3 | KEGG  | hsa00590   | 58 | Y |
| aromatase activity                                     | ↓ | 2 | GO-MF | GO:0070330 | 24 | Y |
| Ascorbate and aldarate metabolism                      | ↓ | 1 | KEGG  | hsa00053   | 25 | Y |
| beta-Alanine metabolism                                | ↓ | 2 | KEGG  | hsa00410   | 22 | Y |
| Drug metabolism - cytochrome P450                      | ↓ | 3 | KEGG  | hsa00982   | 72 | Y |
| epoxide hydrolase activity                             | ↓ | 1 | GO-MF | GO:0004301 | 4  | Y |
| Fatty acid metabolism                                  | ↓ | 2 | KEGG  | hsa00071   | 42 | Y |
| Glycerolipid metabolism                                | ↓ | 2 | KEGG  | hsa00561   | 45 | Y |
| Glycolysis / Gluconeogenesis                           | ↓ | 2 | KEGG  | hsa00010   | 62 | Y |
| Histidine metabolism                                   | ↓ | 2 | KEGG  | hsa00340   | 29 | Y |
| Linoleic acid metabolism                               | ↓ | 2 | KEGG  | hsa00591   | 30 | Y |
| Metabolism of xenobiotics by cytochrome P450           | ↓ | 3 | KEGG  | hsa00980   | 70 | Y |
| Phenylalanine metabolism                               | ↓ | 1 | KEGG  | hsa00360   | 21 | Y |
| polysaccharide binding                                 | ↓ | 1 | GO-MF | GO:0030247 | 11 | Y |
| Primary bile acid biosynthesis                         | ↓ | 1 | KEGG  | hsa00120   | 16 | Y |
| Propanoate metabolism                                  | ↓ | 2 | KEGG  | hsa00640   | 33 | Y |
| protein tyrosine kinase activator activity             | ↓ | 1 | GO-MF | GO:0030296 | 4  | Y |
| protein-glutamine gamma-glutamyltransferase activity   | ↓ | 2 | GO-MF | GO:0003810 | 9  | Y |
| Retinol metabolism                                     | ↓ | 2 | KEGG  | hsa00830   | 64 | Y |
| serine-type peptidase activity                         | ↓ | 1 | GO-MF | GO:0008236 | 22 | Y |
| structural constituent of myelin sheath                | ↓ | 2 | GO-MF | GO:0019911 | 4  | Y |
| Sulfur metabolism                                      | ↓ | 1 | KEGG  | hsa00920   | 13 | Y |
| Tropane, piperidine and pyridine alkaloid biosynthesis | ↓ | 2 | KEGG  | hsa00960   | 9  | Y |
| Tyrosine metabolism                                    | ↓ | 2 | KEGG  | hsa00350   | 47 | Y |
| Valine, leucine and isoleucine degradation             | ↓ | 2 | KEGG  | hsa00280   | 44 | Y |
