# Supplementary material for: Single Sample Expression-Anchored Mechanisms Predict Survival in Head and Neck Cancer
Source: PubMed Central journal article supplement (PMC3266878; doi:10.1371/journal.pcbi.1002350), 2012-01-26
Supplement: pcbi.1002350.s009.pdf [file pcbi.1002350.s009.pdf]

**Table S2: Gene-based vs. FAIME-based classification of HNSCC tumor vs. non-tumor control samples.** *Oncogenic FAIME Features of HNSCC (Methods)* were derived from datasets A, B and C (**Figure 3**), and tested in datasets D and E for its ability to discriminate between tumor vs. non-tumor control tissue. As shown below, FAIME-based classification required less features than Gene-based classification, and obtained equivalent or better accuracy scores. Note that the accuracies reported in the top rows under "Gene-based analysis" are extracted from the original manuscripts cited in the Reference row.

| Dataset ID                     | A                    | B                     | C                 | D                 | E                   |
|--------------------------------|----------------------|-----------------------|-------------------|-------------------|---------------------|
| Reference                      | GSE6631 [61]         | GSE2379 [62]          | E-MEXP-44 [63]    | E-MEXP-44 [63]    | JCO2010 [47]        |
| <b>Gene-based analysis</b>     |                      |                       |                   |                   |                     |
| Computational method           | H-clustering         | PAM; cross-validation | PCA; H-clustering | PCA; H-clustering | Spectral clustering |
| # probe features               | 42                   | 121                   | 338               | 338               | 1000                |
| Accuracy for tumor             | 100%                 | 94%                   | 100%              | 100%              | 99%                 |
| Accuracy for non-tumor control | 59%                  | 100%                  | 74%               | 74%               | 86%                 |
| <i>Overall Accuracy</i>        | 71%                  | 95%                   | 90%               | 90%               | 96%                 |
| <hr/>                          |                      |                       |                   |                   |                     |
| <b>FAIME analysis</b>          |                      |                       |                   |                   |                     |
| # mechanism features           |                      |                       |                   | <b>57</b>         | <b>57</b>           |
| Accuracy for tumor             |                      |                       |                   | <b>100%</b>       | <b>97%</b>          |
| Accuracy for non-tumor control |                      |                       |                   | <b>100%</b>       | <b>86%</b>          |
|                                | <b>Training sets</b> |                       |                   |                   |                     |
| <i>Overall Accuracy</i>        |                      |                       |                   | <b>100%</b>       | <b>96%</b>          |

**Legend:** PAM: Partitioning Around Medoids clustering; PCA: Principal component analysis; H-clustering: Hierarchical clustering.
