# Supplementary material for: Single Sample Expression-Anchored Mechanisms Predict Survival in Head and Neck Cancer
Source: PubMed Central journal article supplement (PMC3266878; doi:10.1371/journal.pcbi.1002350), 2012-01-26
Supplement: pcbi.1002350.s013.pdf [file pcbi.1002350.s013.pdf]

**Table S6. 47 significant *Oncogenic FAIME Features of HNSCC* confirmed in laser microdissected HNSCC dataset GSE9844.** In dataset (GSE9844) comprising 38 samples of laser microdissected HNSCC tissue and 16 non-tumor tissue control samples from the same anatomical site (tongue squamous), we conducted exactly the same methods as reported in **Figure 2** over datasets A, B and C and identified 751 deregulated FAIME scores out of 2,699 KEGG and GO genesets evaluated. Shown below are the 47 significant GO molecular functions and KEGG pathways in HNSCC tumor samples overlapping with the 57 *Oncogenic FAIME Feature of HNSCC* (q-value<0.05, z-test adjusted for multiple comparisons). For each KEGG pathway or GO molecular function (*Oncogenic FAME Feature of HNSCC*), the FDR and q-value are reported. A positive FAIME fold change corresponds to a FAIME Score increased in HNSCC tissue as compared to the non-tumor control tissue and a negative FAIME fold change corresponds to a FAIME Score decreased in HNSCC tissue as compared to the non-tumor control tissue.

| KEGG/GO ID | KEGG pathway/GO function Name                          | FDR      | q-value  |
|------------|--------------------------------------------------------|----------|----------|
| hsa05219   | Bladder cancer                                         | 5.97E-03 | 4.91E-04 |
| hsa00982   | Drug metabolism - cytochrome P450                      | 5.97E-03 | 4.91E-04 |
| hsa00641   | 3-Chloroacrylic acid degradation                       | 6.96E-03 | 5.72E-04 |
| GO:0070330 | aromatase activity                                     | 1.08E-02 | 5.95E-04 |
| GO:0003997 | acyl-CoA oxidase activity                              | 1.93E-02 | 1.06E-03 |
| hsa00591   | Linoleic acid metabolism                               | 1.53E-02 | 1.26E-03 |
| hsa00071   | Fatty acid metabolism                                  | 1.57E-02 | 1.29E-03 |
| hsa00980   | Metabolism of xenobiotics by cytochrome P450           | 1.57E-02 | 1.29E-03 |
| hsa05222   | Small cell lung cancer                                 | 1.57E-02 | 1.29E-03 |
| hsa00350   | Tyrosine metabolism                                    | 1.57E-02 | 1.29E-03 |
| GO:0003995 | acyl-CoA dehydrogenase activity                        | 2.63E-02 | 1.45E-03 |
| GO:0019911 | structural constituent of myelin sheath                | 3.37E-02 | 1.86E-03 |
| hsa00360   | Phenylalanine metabolism                               | 2.74E-02 | 2.25E-03 |
| hsa04512   | ECM-receptor interaction                               | 2.75E-02 | 2.26E-03 |
| hsa00640   | Propanoate metabolism                                  | 2.75E-02 | 2.26E-03 |
| hsa00830   | Retinol metabolism                                     | 2.75E-02 | 2.26E-03 |
| GO:0004656 | procollagen-proline 4-dioxygenase activity             | 5.84E-02 | 3.22E-03 |
| hsa00960   | Tropane, piperidine and pyridine alkaloid biosynthesis | 4.44E-02 | 3.65E-03 |
| GO:0004030 | aldehyde dehydrogenase [NAD(P)+] activity              | 7.26E-02 | 4.01E-03 |
| GO:0050840 | extracellular matrix binding                           | 7.26E-02 | 4.01E-03 |
| hsa00120   | Primary bile acid biosynthesis                         | 4.89E-02 | 4.02E-03 |
| hsa00280   | Valine, leucine and isoleucine degradation             | 5.13E-02 | 4.21E-03 |
| hsa05200   | Pathways in cancer                                     | 5.45E-02 | 4.48E-03 |
| GO:0004029 | aldehyde dehydrogenase (NAD) activity                  | 1.06E-01 | 5.82E-03 |
| GO:0047372 | acylglycerol lipase activity                           | 1.11E-01 | 6.10E-03 |

|            |                                                                                                       |          |          |
|------------|-------------------------------------------------------------------------------------------------------|----------|----------|
| hsa00340   | Histidine metabolism                                                                                  | 7.80E-02 | 6.41E-03 |
| hsa03030   | DNA replication                                                                                       | 8.23E-02 | 6.76E-03 |
| hsa00053   | Ascorbate and aldarate metabolism                                                                     | 9.47E-02 | 7.78E-03 |
| hsa00590   | Arachidonic acid metabolism                                                                           | 9.53E-02 | 7.83E-03 |
| hsa00650   | Butanoate metabolism                                                                                  | 9.53E-02 | 7.83E-03 |
| hsa00624   | 1- and 2-Methylnaphthalene degradation                                                                | 1.18E-01 | 9.69E-03 |
| hsa00410   | beta-Alanine metabolism                                                                               | 1.18E-01 | 9.69E-03 |
| hsa00240   | Pyrimidine metabolism                                                                                 | 1.23E-01 | 1.01E-02 |
| GO:0048407 | platelet-derived growth factor binding                                                                | 1.87E-01 | 1.03E-02 |
| hsa00532   | Glycosaminoglycan biosynthesis - chondroitin sulfate                                                  | 1.27E-01 | 1.04E-02 |
| GO:0003810 | protein-glutamine gamma-glutamyltransferase activity                                                  | 2.09E-01 | 1.15E-02 |
| GO:0004222 | metalloendopeptidase activity                                                                         | 2.17E-01 | 1.19E-02 |
| GO:0004523 | ribonuclease H activity                                                                               | 2.20E-01 | 1.21E-02 |
| GO:0016538 | cyclin-dependent protein kinase regulator activity                                                    | 2.55E-01 | 1.40E-02 |
| hsa04110   | Cell cycle                                                                                            | 1.84E-01 | 1.52E-02 |
| hsa00561   | Glycerolipid metabolism                                                                               | 2.48E-01 | 2.04E-02 |
| hsa03410   | Base excision repair                                                                                  | 2.51E-01 | 2.06E-02 |
| GO:0016705 | oxidoreductase activity, acting on paired donors, with incorporation or reduction of molecular oxygen | 5.14E-01 | 2.83E-02 |
| GO:0030247 | polysaccharide binding                                                                                | 6.16E-01 | 3.40E-02 |
| GO:0004301 | epoxide hydrolase activity                                                                            | 7.64E-01 | 4.22E-02 |
| hsa04115   | p53 signaling pathway                                                                                 | 5.63E-01 | 4.62E-02 |
| hsa04510   | Focal adhesion                                                                                        | 5.86E-01 | 4.81E-02 |

---
