# Supplementary material for: Single Sample Expression-Anchored Mechanisms Predict Survival in Head and Neck Cancer
Source: PubMed Central journal article supplement (PMC3266878; doi:10.1371/journal.pcbi.1002350), 2012-01-26
Supplement: pcbi.1002350.s014.pdf [file pcbi.1002350.s014.pdf]

**Table S7. Non-tumor Control Samples.** Shown below are the total number, tissue location, details of epithelial tissue enrichment, and classes of non-tumor controls for each dataset in our study as reported in the original publications cited in the Reference column.

| ID in the manuscript | Reference      | Total # of control samples | Tissue location of control sample | Enriched for epithelial tissue | Classes of control samples                                |                                                                                    |                                    |
|----------------------|----------------|----------------------------|-----------------------------------|--------------------------------|-----------------------------------------------------------|------------------------------------------------------------------------------------|------------------------------------|
|                      |                |                            |                                   |                                | 1. Non-smoker and no history of HNSCC independent control | 2. Paired sample from uninvolved, distant site from tumor (>3 cm or contralateral) | 3. Paired sample from tumor margin |
| <b>A</b>             | GSE6631 [61]   | 22 (paired)                | Mucosae                           | N                              | 0                                                         | 100%                                                                               | 0                                  |
| <b>B</b>             | GSE2379 [62]   | 10                         | Uvula                             | Y                              | 20%                                                       | 0                                                                                  | 80%                                |
| <b>C</b>             | E-MEXP-44 [63] | 15 (paired)                | Mucosae                           | N                              | 0                                                         | 0                                                                                  | 100%                               |
| <b>D</b>             | E-MEXP-44 [63] | 12 (paired)                | Mucosae                           | N                              | 0                                                         | 0                                                                                  | 100%                               |
| <b>E</b>             | JCO2010 [47]   | 14                         | Mucosae                           | Y                              | 21%                                                       | 79%                                                                                | 0                                  |
| <b>F</b>             | GSE686 [48]    | 3                          | Tonsillar epithelium              | Y                              | 100%                                                      | 0                                                                                  | 0                                  |
| <b>GSE2837</b>       | GSE2837 [65]   | 1                          | Mucosae                           | Y                              | NA                                                        | NA                                                                                 | NA                                 |
| <b>GSE9844</b>       | GSE9844 [64]   | 16                         | Tongue Squamous Cells             | Y (Microdissected)             | NA                                                        | NA                                                                                 | NA                                 |
