# Supplementary material for: Single Sample Expression-Anchored Mechanisms Predict Survival in Head and Neck Cancer
Source: PubMed Central journal article supplement (PMC3266878; doi:10.1371/journal.pcbi.1002350), 2012-01-26
Supplement: pcbi.1002350.s017.pdf [file pcbi.1002350.s017.pdf]

Supplementary Text S2: R codes to run FAIME

```
#####
# "FAIME" is a new algorithm to predict Functional Analysis of Individual Microarray Expression.
#
# This R code is composed one main function "runFAIME", which is a R wrap for FAIME.      #
# Programmer: Xinan Yang (xyang2 at uchicago.edu)                                     #
# Last updated on Feb 22th, 2010.                                                    #
# Version 2                                                                           #
#                                                                                       #
# Update recorder:                                                                    #
# Added a parameter weightRank=TRUE; if FALSE, no weighted rank will be used instead  #
#####

#####
## Pre-required R package    ##
#####
## To install Bioconductor three packages, include the following in your R code.
## source("http://bioconductor.org/biocLite.R")
## biocLite("Biobase")

library("Biobase")

# Declaration of instants which need to be locally modified by user.
ArrayInput          # mRNA-expression input file name.
Geneset2gene        # an 2 column matrix mapping between GO to genes
FDR.T = 0.05        # Threshold to call a gene-set as significant
genewprobe          # array of microarray probe IDs with annotated gene symbol

#####
## The key function to implement FAIME algorithm    ##
#####
## parameters (inputs):
## sampleExp: A vector of normalized exp value with probeName
## genemembers: A vector of probeName of the gene members of a geneset of interest
## weightRank: A logical to decide whether weighted rank to be used, default is TRUE.
##   if weithRank="mild", the exp( (rank-N)/N) was applied which controls the weights
## between 0 and 1
## output:
## y: A score assigned to each microRNA

FAIME <- function(sampleExp, genemembers, na.last=TRUE, weightRank,
logCheck=FALSE)
{
  # check if it log transformed, if not, log transformed #
  if (logCheck) { # by this transformation, negative value will be scaled to NA #
    if (max(sampleExp) > 20) sampleExp <- log2(SampleExp)
  }

  if (any(is.na(names(sampleExp)))) stop("Please input sampleExp with probe IDs")
  allGenes <- names(sampleExp)
  N <- length(allGenes)
  nongenemembers <- allGenes[-which(allGenes %in% genemembers)]
}
```

```

# Step 1: Calculation of weighted rank of gene expression #
# Rank from the lowest to highest, thus the leading up-regulated genes get the higher
weighted score #
rankedExp <- rank(sampleExp, na.last=na.last)
if(weightRank=="mild") {
    rankscore <- rankedExp*exp((rankedExp-N)/N)
} else {
    if (weightRank) {
        rankscore <- rankedExp*exp(rankedExp/N)
    } else {
        rankscore <- rankedExp
    }
}

# Step 2: Calculate F-score for each individual gene-set per a sample using mRNA
expression of their gene members and that of its none-members #
ST <- sum(rankscore[genemembers])/length(genemembers)
SN <- sum(rankscore[nongenemembers])/length(nongenemembers)
y <- ST - SN
return(y)
}

```

```

#####
## The main function to run FAIME ##
#####
## parameters (inputs):
## dat: An expression matrix, row for a probeName and column for a sample
## genewprobe: A vector of gene Symbol for rows of dat, the names of which is probeName
## geneset2gene: An one-to-one mapping matrix with two columns,
##     the 1st column is geneset ID/name, and the 2nd is its gene members
## weightRank: A logical to decide whether weighted rank to be used, default is TRUE.
## if weithRank="mild" the exp( (rank-N)/N) was applied which controls the weights
##     between 0 and 1
## output:
## res: A matrix of transformed microRNA profiling, the score calculated by FAIME

runFAIME <- function(dat, genewprobe, geneset2gene, na.last=TRUE, weightRank=TRUE)
{
    if (class(dat)=="ExpressionSet") dat <- exprs(dat)
    if (is.null(names(genewprobe))) stop("Please input the zz as a named vector for gene
Symbol!")
    allSym <- genewprobe [rownames(dat)]
    seeds <- unique(geneset2gene[,1])
    res <- matrix(nrow=length(seeds), ncol=ncol(dat))
    rownames(res) <- seeds
    colnames(res) <- colnames(dat)
    geneIDs <- rownames(dat)

    for(i in 1:length(seeds))
    {
        genemembers <- geneset2gene[which(geneset2gene [,1]==seeds[i]),2]
    }
}

```

**Expression-Anchored Pathway Profiles of Individual Samples Predicts Survival**, Yang X et al.

```
targetP <- unlist(allSym[which(allSym %in% genemembers)])
for (j in 1:ncol(dat))
{
  oneSampleExp <- dat[,j]
  names(oneSampleExp) <- geneIDs
  res[i,j] <- FAIME(oneSampleExp, genemembers=names(targetP),
                    na.last=na.last, weightRank=weightRank)
}
}
length(which(is.na(res[,1]))) # there might be geneset without measured member gene on
this array #
return(res)
}
```
