# Supplementary material for: Single Sample Expression-Anchored Mechanisms Predict Survival in Head and Neck Cancer
Source: PLOS journal article supplement (doi:10.1371/journal.pcbi.1002350), 2012-01-26
Supplement: S16 (10.1371/journal.pcbi.1002350.s016) [file journal.pcbi.1002350.s016]

301 Moved Permanently

# Moved Permanently

The document has moved here.

---

Apache Server at www.ploscompbiol.org Port 80
