# Supplementary material for: Single Sample Expression-Anchored Mechanisms Predict Survival in Head and Neck Cancer
Source: PLoS Comput Biol. 2012 Jan 26;8(1):e1002350. doi: 10.1371/journal.pcbi.1002350 (PMC3266878; doi:10.1371/journal.pcbi.1002350)
Supplement: Table S3 — Two Prioritized Recurrence-Free Survival (RFS) prognostic mechanisms identified by FAIME in two HNSCC datasets (E,F). (PDF) [file pcbi.1002350.s010.pdf]

**Table S3. Five prioritized Recurrence-Free Survival prognostic mechanisms identified by FAIME in two HNSCC datasets (E,F).** FAIME scores of each of the 208 measurable KEGG pathways and 956 GO-MF mechanism is first calculated in each tumor sample. The Cox proportional hazard is calculated for each mechanism in dataset E using the time to recurrence associated with each sample and then repeated in dataset F producing the unadjusted "prognostic p-values" shown in the table (**Methods**). Finally, a "joint prognostic p-value" was calculated from these two individual dataset prognostic p-values for each of these mechanisms using Stouffer meta-analysis. Presented here are mechanisms with Bonferroni adjustment joint p-values <0.05 thus controlled for multiple comparisons. A Spearman non-parametric correlation was also calculated between the FAIME scores and the 1st component of Principle Component Analysis (PCA) values across samples in each dataset.

| Recurrence-Free Survival (RFS) prognostic mechanisms predictors | ID         | # genes | Cox Proportional Hazards of Recurrence-Free Survival |                           |                                          |                                            | Cox Regression Coefficients* |           | Spearman Correlation of FAIME-Scores with those of the 1st Component of the Principal Component Analysis |                     |
|-----------------------------------------------------------------|------------|---------|------------------------------------------------------|---------------------------|------------------------------------------|--------------------------------------------|------------------------------|-----------|----------------------------------------------------------------------------------------------------------|---------------------|
|                                                                 |            |         | P-values                                             |                           |                                          | Bonferroni-adjusted Stouffer meta-analysis | Dataset E                    | Dataset F | Pvalue in Dataset E                                                                                      | Pvalue in Dataset F |
|                                                                 |            |         | unadjusted P in Dataset E                            | unadjusted P in Dataset F | unadjusted Stouffer meta-analysis Pvalue |                                            |                              |           |                                                                                                          |                     |
|                                                                 |            |         |                                                      |                           |                                          |                                            |                              |           |                                                                                                          |                     |
| Apoptosis                                                       | hsa04210   | 89      | 2.38E-04                                             | 5.91E-04                  | 9.51E-07                                 | <b>2.62E-03</b>                            | 5.91E-04                     | 4.69E-02  | 9.51E-07                                                                                                 | 2.62E-03            |
| receptor signaling complex scaffold activity                    | GO:0030159 | 13      | 2.52E-07                                             | 5.04E-02                  | 1.22E-06                                 | <b>3.35E-03</b>                            | 5.04E-02                     | 3.89E-02  | 1.22E-06                                                                                                 | 3.35E-03            |

\*a negative coefficient indicates is associated with a higher FAIME score in a sample

| Recurrence-Free Survival (RFS) prognostic mechanisms predictors | ID         | # genes | Dataset E             |                             | Dataset F             |                             | Stouffer     | meta-analysis         |
|-----------------------------------------------------------------|------------|---------|-----------------------|-----------------------------|-----------------------|-----------------------------|--------------|-----------------------|
|                                                                 |            |         | Cox regression test P | Cox regression coefficient* | Cox regression test P | Cox regression coefficient* | unadjusted p | Bonferroni adjusted p |
|                                                                 |            |         |                       |                             |                       |                             |              |                       |
| Apoptosis                                                       | hsa04210   | 89      | 2.38E-04              | -3.42E-03                   | 5.91E-04              | -5.44E-03                   | 9.51E-07     | 2.62E-03              |
| receptor signaling complex scaffold activity                    | GO:0030159 | 13      | 2.52E-07              | -1.64E-03                   | 5.04E-02              | -9.55E-04                   | 1.22E-06     | 3.35E-03              |

\*a positive coefficient indicates the higher a FAIME score, the poorer the prognosis; a negative coefficient indicates the higher a FAIME score, the better the prognosis.
