# Supplementary material for: Single Sample Expression-Anchored Mechanisms Predict Survival in Head and Neck Cancer
Source: PLoS Comput Biol. 2012 Jan 26;8(1):e1002350. doi: 10.1371/journal.pcbi.1002350 (PMC3266878; doi:10.1371/journal.pcbi.1002350)
Supplement: Table S4 — KEGG apoptosis geneset (hsa04210) measurable among 26 laser microdissected head and neck tumor samples (GSE9844). (PDF) [file pcbi.1002350.s011.pdf]

**Table S4. KEGG apoptosis geneset (hsa04210) measurable among 26 laser microdissected head and neck tumor samples (GSE9844).** The average expression values (log2 scale) of gene members in the KEGG apoptosis geneset are reported for HNSCC laser microdissected dataset GSE9844.

| Gene Symbol | Gene Description                                                                              | Average expression |
|-------------|-----------------------------------------------------------------------------------------------|--------------------|
| PIK3CB      | phosphoinositide-3-kinase, catalytic, beta polypeptide                                        | 5.03               |
| TP53        | tumor protein p53                                                                             | 3.72               |
| BIRC3       | baculoviral IAP repeat-containing 3                                                           | 4.72               |
| CSF2RB      | colony stimulating factor 2 receptor, beta, low-affinity (granulocyte-macrophage)             | 6.97               |
| AKT3        | v-akt murine thymoma viral oncogene homolog 3 (protein kinase B, gamma)                       | 4.24               |
| PRKAR1B     | protein kinase, cAMP-dependent, regulatory, type I, beta                                      | 5.58               |
| PIK3CG      | phosphoinositide-3-kinase, catalytic, gamma polypeptide                                       | 3.04               |
| PIK3R3      | phosphoinositide-3-kinase, regulatory subunit 3 (gamma)                                       | 3.82               |
| PIK3R2      | phosphoinositide-3-kinase, regulatory subunit 2 (beta)                                        | 5.60               |
| IKBKB       | inhibitor of kappa light polypeptide gene enhancer in B-cells, kinase beta                    | 5.03               |
| CASP8       | caspase 8, apoptosis-related cysteine peptidase                                               | 4.32               |
| CASP10      | caspase 10, apoptosis-related cysteine peptidase                                              | 4.16               |
| DFFA        | DNA fragmentation factor, 45kDa, alpha polypeptide                                            | 5.81               |
| TNFRSF10C   | tumor necrosis factor receptor superfamily, member 10c, decoy without an intracellular domain | 3.92               |
| CHP         | calcium binding protein P22                                                                   | 6.42               |
| BCL2L1      | BCL2-like 1                                                                                   | 4.40               |
| PRKAR2A     | protein kinase, cAMP-dependent, regulatory, type II, alpha                                    | 7.15               |
| IRAK4       | interleukin-1 receptor-associated kinase 4                                                    | 3.58               |
| CASP3       | caspase 3, apoptosis-related cysteine peptidase                                               | 4.16               |
| IRAK2       | interleukin-1 receptor-associated kinase 2                                                    | 4.34               |
| CHUK        | conserved helix-loop-helix ubiquitous kinase                                                  | 4.87               |
| CFLAR       | CASP8 and FADD-like apoptosis regulator                                                       | 5.07               |
| CYCS        | cytochrome c, somatic                                                                         | 6.01               |
| IRAK1       | interleukin-1 receptor-associated kinase 1                                                    | 7.56               |
| PPP3CB      | protein phosphatase 3, catalytic subunit, beta isozyme                                        | 6.75               |
| BAD         | BCL2-associated agonist of cell death                                                         | 3.75               |
| IL1R1       | interleukin 1 receptor, type I                                                                | 5.72               |
| IL1A        | interleukin 1, alpha                                                                          | 4.37               |
| PIK3CA      | phosphoinositide-3-kinase, catalytic, alpha polypeptide                                       | 3.96               |
| IL1B        | interleukin 1, beta                                                                           | 6.90               |
| PPP3CC      | protein phosphatase 3, catalytic subunit, gamma isozyme                                       | 3.88               |
| ATM         | ataxia telangiectasia mutated                                                                 | 3.60               |
| PRKAR2B     | protein kinase, cAMP-dependent, regulatory, type II, beta                                     | 3.59               |

|           |                                                                                            |      |
|-----------|--------------------------------------------------------------------------------------------|------|
| TNFRSF10D | tumor necrosis factor receptor superfamily, member 10d, decoy with truncated death domain  | 4.82 |
| TNF       | tumor necrosis factor                                                                      | 4.23 |
| FASLG     | Fas ligand (TNF superfamily, member 6)                                                     | 4.00 |
| IRAK3     | interleukin-1 receptor-associated kinase 3                                                 | 3.22 |
| PIK3CD    | phosphoinositide-3-kinase, catalytic, delta polypeptide                                    | 5.15 |
| CASP9     | caspase 9, apoptosis-related cysteine peptidase                                            | 4.64 |
| PRKAR1A   | protein kinase, cAMP-dependent, regulatory, type I, alpha (tissue specific extinguisher 1) | 6.26 |
| MYD88     | myeloid differentiation primary response gene (88)                                         | 8.02 |
| BCL2      | B-cell CLL/lymphoma 2                                                                      | 4.35 |
| PPP3CA    | protein phosphatase 3, catalytic subunit, alpha isozyme                                    | 7.17 |
| PRKX      | protein kinase, X-linked                                                                   | 4.15 |
| APAF1     | apoptotic peptidase activating factor 1                                                    | 3.89 |
| TNFSF10   | tumor necrosis factor (ligand) superfamily, member 10                                      | 8.00 |
| IL1RAP    | interleukin 1 receptor accessory protein                                                   | 4.37 |
| PIK3R1    | phosphoinositide-3-kinase, regulatory subunit 1 (alpha)                                    | 4.80 |
| CAPN2     | calpain 2, (m/II) large subunit                                                            | 8.03 |
| CASP7     | caspase 7, apoptosis-related cysteine peptidase                                            | 7.00 |
| CASP6     | caspase 6, apoptosis-related cysteine peptidase                                            | 4.75 |
| FADD      | Fas (TNFRSF6)-associated via death domain                                                  | 6.01 |
| PRKACB    | protein kinase, cAMP-dependent, catalytic, beta                                            | 4.95 |
| RIPK1     | receptor (TNFRSF)-interacting serine-threonine kinase 1                                    | 4.44 |
| MAP3K14   | mitogen-activated protein kinase kinase kinase 14                                          | 4.15 |
| PRKACA    | protein kinase, cAMP-dependent, catalytic, alpha                                           | 5.31 |
| PRKY      | protein kinase, Y-linked                                                                   | 4.05 |
| NTRK1     | neurotrophic tyrosine kinase, receptor, type 1                                             | 3.00 |
| XIAP      | X-linked inhibitor of apoptosis                                                            | 5.02 |
| BID       | BH3 interacting domain death agonist                                                       | 7.04 |
| AIFM1     | apoptosis-inducing factor, mitochondrion-associated, 1                                     | 6.38 |
| CAPN1     | calpain 1, (mu/I) large subunit                                                            | 5.76 |
| BAX       | BCL2-associated X protein                                                                  | 3.97 |
| CHP2      | calcineurin B homologous protein 2                                                         | 4.60 |
| DFFB      | DNA fragmentation factor, 40kDa, beta polypeptide (caspase-activated DNase)                | 5.69 |
| AKT2      | v-akt murine thymoma viral oncogene homolog 2                                              | 4.77 |
| AKT1      | v-akt murine thymoma viral oncogene homolog 1                                              | 3.47 |
| IL3       | interleukin 3 (colony-stimulating factor, multiple)                                        | 3.00 |
| TNFRSF10B | tumor necrosis factor receptor superfamily, member 10b                                     | 6.43 |
| TNFRSF1A  | tumor necrosis factor receptor superfamily, member 1A                                      | 7.93 |
| PPP3R1    | protein phosphatase 3, regulatory subunit B, alpha                                         | 3.85 |
| ENDOG     | endonuclease G                                                                             | 5.87 |
| NFKBIA    | nuclear factor of kappa light polypeptide gene enhancer in B-cells inhibitor, alpha        | 6.69 |

|           |                                                                                        |      |
|-----------|----------------------------------------------------------------------------------------|------|
| RELA      | v-rel reticuloendotheliosis viral oncogene homolog A (avian)                           | 4.95 |
| FAS       | Fas (TNF receptor superfamily, member 6)                                               | 3.94 |
| BIRC2     | baculoviral IAP repeat-containing 2                                                    | 9.85 |
| IL3RA     | interleukin 3 receptor, alpha (low affinity)                                           | 4.98 |
| NFKB1     | nuclear factor of kappa light polypeptide gene enhancer in B-cells<br>1                | 4.71 |
| TRAF2     | TNF receptor-associated factor 2                                                       | 4.98 |
| IKBKG     | inhibitor of kappa light polypeptide gene enhancer in B-cells,<br>kinase gamma         | 6.22 |
| TNFRSF10A | tumor necrosis factor receptor superfamily, member 10a                                 | 4.16 |
| EXOG      | endo/exonuclease (5'-3'), endonuclease G-like                                          | 3.81 |
| ENDOD1    | endonuclease domain containing 1                                                       | 6.43 |
| PIK3R5    | phosphoinositide-3-kinase, regulatory subunit 5                                        | 3.96 |
| NGF       | nerve growth factor (beta polypeptide)                                                 | 4.46 |
| PPP3R2    | protein phosphatase 3, regulatory subunit B, beta                                      | 3.26 |
| PRKACG    | protein kinase, cAMP-dependent, catalytic, gamma                                       | 4.15 |
| TRADD     | TNFRSF1A-associated via death domain                                                   | 5.61 |
| LOC651610 | similar to Serine-protein kinase ATM (Ataxia telangiectasia<br>mutated) (A-T, mutated) | N/A  |

---
