# Supplementary material for: Single Sample Expression-Anchored Mechanisms Predict Survival in Head and Neck Cancer
Source: PLoS Comput Biol. 2012 Jan 26;8(1):e1002350. doi: 10.1371/journal.pcbi.1002350 (PMC3266878; doi:10.1371/journal.pcbi.1002350)
Supplement: Table S8 — Clinical features. (PDF) [file pcbi.1002350.s015.pdf]

**Tables S8A-C. Clinical Features.** Show below are the percentage of patients with clinical information reported in each dataset from respective publications for TNM stage (**6A**), P53 and HPV status (**6B**), and Smoking and Alcohol history (**6C**).

**Table S8A: TNM stage reported for patients in each dataset**

| <b>Dataset</b>                | <b>A</b> | <b>B</b> | <b>C</b> | <b>D</b> | <b>E</b> | <b>F</b> |
|-------------------------------|----------|----------|----------|----------|----------|----------|
| % of patients with TNM status | 100%     | 100%     | NA       | NA       | 100%     | 73%      |

**Table S8B: P53 and HPV status reported for patient samples in each dataset**

| <b>Dataset</b>                | <b>A</b> | <b>B</b> | <b>C</b> | <b>D</b> | <b>E</b> | <b>F</b> |
|-------------------------------|----------|----------|----------|----------|----------|----------|
| % of patients with P53 status | 100%     | NA       | NA       | NA       | NA       | NA       |
| % of patients with HPV status | NA       | NA       | NA       | NA       | 100%     | NA       |

**Table S8C: Smoking and Alcohol history reported for patients in each dataset**

| <b>Dataset</b>                     | <b>A</b> | <b>B</b> | <b>C</b> | <b>D</b> | <b>E</b> | <b>F</b> |
|------------------------------------|----------|----------|----------|----------|----------|----------|
| % of patients with smoking history | NA       | NA       | NA       | NA       | NA       | 100%     |
| % of patients with alcohol history | NA       | NA       | NA       | NA       | NA       | 100%     |
